# Supplementary material for: Synthesis, Antiviral, and Antimicrobial Evaluation of Benzyl Protected Diversified C-nucleosides
Source: Front Chem. 2018 Jul 19;6:294. doi: 10.3389/fchem.2018.00294 (PMC6060234; doi:10.3389/fchem.2018.00294)
Supplement: Supplementary file 1 [file Table_1.XLS]

## Sheet: Screened Compounds
CompoundID	Compound Name	Barcode	Full MW	Supplied Solid (mg)	Supplied Volume (uL)	Supplied Concentration	Supplied ConcUnit	Stock Solution	Stock Concentration	Stock ConcUnit	Solubility Comment
C0227022	1	FR09953410		3				DMSO	10	mg/mL
C0227023	2	FR09965852		3				DMSO	10	mg/mL
C0227024	3	FR09957441		4				DMSO	10	mg/mL
C0227025	4	FR09966278		3				DMSO	10	mg/mL
C0227026	5	FR09959940		4				DMSO	10	mg/mL
C0227027	6	FR09968679		3				DMSO	10	mg/mL
C0227028	7	FR09968591		4				DMSO	10	mg/mL
C0227029	8	FR09968676		5				DMSO	10	mg/mL
C0227030	9	FR09953408		5				DMSO	10	mg/mL
C0227031	10	FR09966277		4				DMSO	10	mg/mL
C0227032	11	FR09953414		2				DMSO	10	mg/mL
C0227033	12	FR09953412		5				DMSO	10	mg/mL
C0227034	13	FR09956144		4				DMSO	10	mg/mL
C0227035	14	FR09973262		4				DMSO	10	mg/mL	insoluble
C0227036	15	FR09973263		4				DMSO	10	mg/mL

## Sheet: Activity Summary
CompoundID	Compound Code	ProjectID	Hit against # Strains	Sa Hit	Ec Hit	Kp Hit	Pa Hit	Ab Hit	Ca Hit	Cn Hit
C0227022	1	P0242	3	A	I	I	I	A	I	A
C0227023	2	P0242	1	I	I	I	I	A	I	I
C0227024	3	P0242	0	I	I	I	I	I	I	I
C0227025	4	P0242	0	I	I	I	I	I	I	I
C0227026	5	P0242	2	I	I	I	I	P	A	A
C0227027	6	P0242	2	I	I	I	I	I	A	A
C0227028	7	P0242	0	I	I	I	I	I	I	I
C0227029	8	P0242	1	I	I	I	I	A	I	I
C0227030	9	P0242	0	I	I	I	I	P	I	I
C0227031	10	P0242	2	I	I	I	I	P	A	A
C0227032	11	P0242	2	I	I	I	I	I	A	A
C0227033	12	P0242	0	I	I	I	I	I	I	I
C0227034	13	P0242	0	I	I	I	I	I	I	I
C0227035	14	P0242	0	I	I	I	I	I	I	I
C0227036	15	P0242	0	I	I	I	I	I	I	I
				A = Active
				P = Partially active
				I = Inactive

## Sheet: Inhibition Data
CompoundID	Compound Code	ProjectID	Concentration	ConcUnit	PSHit	Sa_Hit	Sa_Inhib1	Sa_ZScore1	Sa_Inhib2	Sa_ZScore2	Ec_Hit	Ec_Inhib1	Ec_ZScore1	Ec_Inhib2	Ec_ZScore2	Kp_Hit	Kp_Inhib1	Kp_ZScore1	Kp_Inhib2	Kp_ZScore2	Pa_Hit	Pa_Inhib1	Pa_ZScore1	Pa_Inhib2	Pa_ZScore2	Ab_Hit	Ab_Inhib1	Ab_ZScore1	Ab_Inhib2	Ab_ZScore2	Ca_Hit	Ca_Inhib1	Ca_ZScore1	Ca_Inhib2	Ca_ZScore2	Cn_Hit	Cn_Inhib1	Cn_ZScore1	Cn_Inhib2	Cn_ZScore2
C0227022	1	P0242	0		3	1	50.762	-4.61959	37.5319	-3.23671	0	14.0998	-4.83369	14.9951	-5.6974	0	23.3439	-2.30882	31.8102	-2.49738	0	1.66774	0.510342	10.7789	-0.602932	1	79.4892	-5.61604	71.7356	-8.78337	0	4.99002	0.487139	-4.90052	0.429227	1	80.3066	-7.60836	81.6327	-9.19974
C0227023	2	P0242	32	ug/mL	1	0	47.0019	-4.26558	43.2842	-3.6886	0	16.5841	-5.29905	16.3173	-5.93109	0	43.3787	-6.19564	42.5196	-3.80345	0	-5.76522	1.66503	3.23428	0.579403	1	85.9037	-6.15896	83.5581	-10.4246	0	-0.864937	1.14665	-7.7745	0.827795	0	-38.0896	1.42095	-44.3878	1.72495
C0227024	3	P0242	32	ug/mL	0	0	4.32987	-0.248077	6.38991	-0.790256	0	-5.84843	-1.09693	-7.99339	-1.63447	0	10.4173	0.198971	9.47062	0.227035	0	10.8979	-0.923529	4.06006	0.449993	0	8.75955	0.370422	8.24931	0.0297445	0	2.06254	0.816894	-1.65807	-0.0204394	0	-27.7123	0.629533	-31.8878	0.641328
C0227025	4	P0242	32	ug/mL	0	0	20.2535	-1.74726	19.6231	-1.82983	0	-5.67098	-1.13017	-8.86485	-1.48045	0	14.5069	-0.594411	16.5516	-0.636523	0	10.5672	-0.87216	10.2909	-0.526463	0	19.1195	-0.506428	12.1061	-0.505656	0	11.976	-0.299778	-4.31098	0.34747	0	-31.4858	0.91732	-27.551	0.265377
C0227026	5	P0242	32	ug/mL	3	0	28.1441	-2.49015	27.1323	-2.41974	0	6.52865	-3.41544	4.26715	-3.80137	0	33.3161	-4.24347	29.5898	-2.22659	0	-1.30832	0.972665	8.52674	-0.249996	1	71.716	-4.95813	53.5354	-6.25684	1	97.3387	-9.91515	97.4576	-13.7659	1	81.25	-7.68031	90.5612	-9.97375
C0227027	6	P0242	32	ug/mL	2	0	14.7272	-1.22697	1.94106	-0.440762	0	-8.85028	-0.534614	-16.1671	-0.189869	0	13.6941	-0.436736	5.70674	0.686058	0	-5.06074	1.55559	6.78761	0.0225487	0	6.10752	0.594887	9.72397	-0.174968	1	99.1351	-10.1175	97.3102	-13.7455	1	80.7783	-7.64433	86.9898	-9.66415
C0227028	7	P0242	32	ug/mL	0	0	32.8728	-2.93535	23.8169	-2.15929	0	-1.11645	-1.98333	-8.50424	-1.54418	0	15.2422	-0.73707	9.22692	0.256756	0	3.66616	0.199893	-0.569284	1.17547	0	19.6028	-0.54734	8.38795	0.0104981	0	11.3772	-0.232328	-10.1326	1.15483	0	-24.6462	0.395707	-30.102	0.486525
C0227029	8	P0242	32	ug/mL	1	0	25.8083	-2.27024	27.7557	-2.46871	0	19.2458	-5.79765	14.0335	-5.52745	0	36.2317	-4.8091	37.0363	-3.13473	0	6.786	-0.284764	15.0328	-1.26959	1	77.6863	-5.46345	64.085	-7.72132	0	14.1051	-0.5396	-1.73176	-0.0102197	0	-49.6462	2.30229	-41.0714	1.43746
C0227030	9	P0242	32	ug/mL	1	0	24.4979	-2.14687	24.5537	-2.21717	0	-3.06839	-1.61769	-12.0051	-0.925446	0	12.2492	-0.156424	29.1971	-2.17871	0	5.10387	-0.0234512	9.12731	-0.344113	1	52.4593	-3.32827	14.1606	-0.790853	0	1.26414	0.906828	-5.49005	0.510985	0	-53.4198	2.59008	-49.4898	2.16725
C0227031	10	P0242	32	ug/mL	3	0	18.1171	-1.54612	21.4933	-1.97675	0	-3.08318	-1.61492	-11.0735	-1.09009	0	17.6417	-1.20259	24.4043	-1.5942	0	8.22371	-0.508108	11.5546	-0.724499	1	59.109	-3.89109	20.6642	-1.69369	1	98.6028	-10.0575	97.1629	-13.7251	1	83.6085	-7.86017	88.7755	-9.81895
C0227032	11	P0242	32	ug/mL	2	0	42.558	-3.8472	28.2658	-2.50878	0	3.8817	-2.9196	-0.93156	-2.88256	0	19.7446	-1.61054	15.2654	-0.479663	0	-0.891381	0.907895	11.9925	-0.793126	0	45.1303	-2.70795	32.9153	-3.39437	1	97.006	-9.87768	97.3839	-13.7557	1	85.967	-8.04004	87.2449	-9.68626
C0227033	12	P0242	32	ug/mL	0	0	2.47828	-0.0737525	12.6523	-1.28222	0	-15.6821	0.745136	-13.718	-0.622718	0	10.0174	0.276558	14.7915	-0.421872	0	4.05435	0.13959	8.17642	-0.195095	0	15.8142	-0.226676	-0.0693219	1.18453	0	2.06254	0.816894	-1.80545	0	0	-38.7972	1.47491	-31.3776	0.597098
C0227034	13	P0242	32	ug/mL	0	0	14.5278	-1.2082	24.5254	-2.21494	0	-17.5749	1.0997	-20.9	0.646617	0	7.24376	0.814656	5.59843	0.699267	0	-1.20768	0.957031	8.03879	-0.173527	0	1.84859	0.955357	1.46836	0.97107	0	7.1191	0.247317	1.14223	-0.408788	0	-43.75	1.85263	-44.1327	1.70284
C0227035	14	P0242	32	ug/mL	0	0	0.569719	0.105935	3.24455	-0.543162	0	-15.5786	0.725745	-14.1237	-0.551019	0	3.73476	1.49541	-0.629569	1.4588	0	-20.7749	3.99675	-4.5355	1.79703	0	7.54458	0.473256	2.42627	0.838095	0	4.05855	0.592061	-4.75313	0.408788	0	-14.7406	-0.359733	-23.9796	-0.0442295
C0227036	15	P0242	32	ug/mL	0	0	6.55177	-0.457265	9.25191	-1.01509	0	-23.6081	2.22987	-19.0519	0.319989	0	5.86338	1.08245	11.4203	-0.0107326	0	10.1646	-0.809623	11.517	-0.718617	0	21.3926	-0.698826	2.67835	0.803101	0	7.3187	0.224833	5.12159	-0.960652	0	-28.8915	0.719467	-37.5	1.12785

## Sheet: Method Analysis
Abbreviation	Code	Name	Description	Strain	Organsim	Type
Sa	GP_020	Staphylococcus aureus	MRSA	ATCC 43300	Bacteria	G+ve
Ec	GN_001	Escherichia coli	FDA control	ATCC 25922	Bacteria	G-ve
Kp	GN_003	Klebsiella pneumoniae	MDR	ATCC 700603	Bacteria	G-ve
Ab	GN_034	Acinetobacter baumannii	Type strain	ATCC 19606	Bacteria	G-ve
Pa	GN_042	Pseudomonas aeruginosa	Type strain	ATCC 27853	Bacteria	G-ve
Ca	FG_001	Candida albicans	CLSI reference	ATCC 90028	Fungi	Yeast
Cn	FG_002	Cryptococcus neoformans var. grubii	Type strain	H99; ATCC 208821	Fungi	Yeast
Antibacterial data collection
Inhibition of bacterial growth was determined measuring absorbance at 600 nm (OD600), using a Tecan M1000 Pro monochromator plate reader. The percentage of growth inhibition was calculated for each well, using the negative control (media only) and positive control (bacteria without inhibitors) on the same plate as references.
Antifungal data collection
Growth inhibition of C. albicans was determined measuring absorbance at 530 nm (OD530), while the growth inhibition of C. neoformans was determined measuring the difference in absorbance between 600 and 570 nm (OD600-570), after the addition of resazurin (0.001% final concentration) and incubation at 35 °C for additional 2 h. The absorbance was measured using a Biotek Synergy HTX plate reader. Th…
Inhibition
Percentage growth inhibition of an individual sample is calculated based on Negative controls (media only) and Positive Controls (bacterial media without inhibitors). Please note Negative inhibition value mean that the growth rate (or OD600) is higher compared to the Negative Control (Bacteria only, set to 0% inhibition). The growth rates for all bacteria and fungi has a variation of -/+ 10%, whi…
Z-Score
Z-Score analysis is done to investigate out-liners or hits amoung the samples. The Z-Score is calculated based on the sample population using a modified Z-Score method which accounts for possible skewed sample population. The modified method uses median and MAD (median average derviation) instead of average and sd, and a scaling factor [Iglewicz, B. & Hoaglin, D. C. Volume 16: How to Detect and H…
Quality Control
All screening are done as two replica (n=2), with both replicas on two different plates, but from single plating and done in a single screening (microbial incubation). Each individual value is reported in the table (see ..1 and ..2). In addition, two values are used as quality control for individual plates: Z'-Factor [ 1 - (3 * (sd(NegCtrl)+sd(PosCtrl))/(average(PosCtrl)-average(NegCtrl))) ] and …
Selection of Actives
A - [Active] Samples with inhibition values equal to or above 80% and abs(Z-Score) above 2.5 for either replicate (n=2 on different plates) were classed as actives.
P - [Partial Active] compounds with inhibition values between 50.9% - 79.9% or abs(Z-Sore) below 2.5.
I - Inactive compounds with inhibition values below 50% or abs(Z-Sore) below 2.5.
Additional Columns
PSHit: Indicate the number of organisms the compound has been found active against, 0 no activity Xx_Hit: Indicate if compound is active against specific organism (Sa, Ec, Kp, Pa, Kp, Ca or Cn)
